# Supplementary material for: Future CO2-induced seawater acidification mediates the physiological performance of a green alga Ulva linza in different photoperiods
Source: PeerJ. 2019 Jun 4;7:e7048. doi: 10.7717/peerj.7048 (PMC6555391; doi:10.7717/peerj.7048)
Supplement: Data S1 — Each data points indicates the average performance of triplicate. [file peerj-07-7048-s001.xls]

## Sheet: Fig.1
				RGR (d-1)
Treatments	Triplicate 1	Triplicate 2	Triplicate 3	Mean	SD
8:16 LC	0.28395	0.28529	0.28461	0.28462	0.000666943
8:16 HC	0.32536	0.32488	0.32035	0.32353	0.00276
12:12 LC	0.41157	0.42311	0.4146	0.41642	0.00598
12:12 HC	0.40714	0.39439	0.39383	0.39845	0.00753
16:8 LC	0.54488	0.52933	0.53782	0.53734	0.00779
16:8 HC	0.34333	0.34046	0.40857	0.36412	0.03852

## Sheet: Fig. 2
				Yield											NPQ
Treatments	Triplicate 1	Triplicate 2	Triplicate 3	Mean	SD						Treatments	Triplicate 1	Triplicate 2	Triplicate 3	Mean	SD
8:16 LC	0.56974	0.5547	0.53971	0.55472	0.01502						8:16 LC	0.16333	0.15667	0.16	0.16	0.00471
8:16 HC	0.69333	0.67075	0.64687	0.67032	0.02323						8:16 HC	0.17667	0.15667	0.18667	0.17333	0.01528
12:12 LC	0.59252	0.5595	0.59372	0.58191	0.01942						12:12 LC	0.25667	0.17333	0.26333	0.23111	0.05015
12:12 HC	0.70238	0.66667	0.70822	0.69242	0.02249						12:12 HC	0.16667	0.19	0.27667	0.21111	0.05796
16:8 LC	0.70849	0.69653	0.72334	0.70946	0.01343						16:8 LC	0.26	0.27333	0.24333	0.25889	0.01503
16:8 HC	0.59712	0.47612	0.64558	0.57294	0.08728						16:8 HC	0.23333	0.29333	0.21333	0.24667	0.04163

## Sheet: Fig. 3
Treatment		Triplicate 1		Triplicate 2		Triplicate 3		rETR			Treatment		Triplicate 1		Triplicate 2		Triplicate 3		rETR
8:16 LC	PAR							Mean	SD		8:16 HC	PAR							Mean	SD
	10	2.352	1.89	1.848	2.226	2.268	2.142	2.121	0.20704			10	2.814	2.436	2.73	2.268	2.226	2.562	2.506	0.24005
	20	4.704	4.2	4.116	4.452	4.956	4.872	4.55	0.35006			20	5.544	5.124	5.46	5.04	4.872	5.04	5.18	0.26385
	50	10.71	10.71	10.29	10.29	12.39	12.18	11.095	0.94305			50	12.81	12.39	12.81	12.39	12.18	11.55	12.355	0.46801
	100	19.32	19.32	18.48	18.9	23.94	23.52	20.58	2.46336			100	23.1	23.1	23.52	23.52	23.1	21.42	22.96	0.782
	300	39.06	37.8	37.8	35.28	49.14	49.14	41.37	6.14263			300	51.66	49.14	50.4	49.14	47.88	45.36	48.93	2.17023
	500	50.4	48.3	46.2	46.2	56.7	56.7	50.75	4.86487			500	65.1	63	58.8	58.8	58.8	60.9	60.9	2.65631
	1000	42	42	46.2	42	46.2	46.2	44.1	2.30043			1000	54.6	54.6	50.4	50.4	50.4	50.4	51.8	2.16887
Treatment		Triplicate 1		Triplicate 2		Triplicate 3		rETR			Treatment		Triplicate 1		Triplicate 2		Triplicate 3		rETR
12:12 LC	PAR							Mean	SD		12:12 HC	PAR							Mean	SD
	10	2.184	1.764	1.764	2.016	1.974	1.428	1.855	0.26352			10	2.184	1.764	1.764	2.016	1.974	1.428	2.443	0.26083
	20	4.284	3.78	3.78	4.368	4.284	3.276	3.962	0.42639			20	4.284	3.78	3.78	4.368	4.284	3.276	5.194	0.21525
	50	9.87	9.45	9.45	10.71	10.29	8.61	9.73	0.7355			50	9.87	9.45	9.45	10.71	10.29	8.61	12.705	0.31848
	100	16.38	17.22	17.22	19.32	18.9	15.96	17.5	1.34575			100	16.38	17.22	17.22	19.32	18.9	15.96	23.66	0.57383
	300	34.02	35.28	34.02	36.54	37.8	28.98	34.44	3.05187			300	34.02	35.28	34.02	36.54	37.8	28.98	50.82	1.72149
	500	46.2	44.1	44.1	50.4	46.2	37.8	44.8	4.12941			500	46.2	44.1	44.1	50.4	46.2	37.8	62.65	2.0647
	1000	46.2	42	42	46.2	42	37.8	42.7	3.16165			1000	46.2	42	42	46.2	42	37.8	57.4	2.16887
Treatment		Triplicate 1		Triplicate 2		Triplicate 3		rETR			Treatment		Triplicate 1		Triplicate 2		Triplicate 3		rETR
16:8 LC	PAR							Mean	SD		16:8 LC	PAR							Mean	SD
	10	2.646	2.31	2.184	2.814	2.31	2.142	2.401	0.26882			10	2.142	1.806	1.722	2.436	1.806	1.848	1.96	0.27434
	20	4.956	4.62	4.536	5.628	5.124	5.04	4.984	0.3928			20	4.368	3.864	3.78	4.788	4.368	4.368	4.256	0.37441
	50	11.55	11.34	11.13	13.44	12.39	12.18	12.005	0.85475			50	10.08	9.45	9.66	11.55	11.34	11.34	10.57	0.94539
	100	20.16	20.58	20.16	23.94	23.52	23.52	21.98	1.85308			100	17.22	18.9	16.8	21	21.84	21.84	19.6	2.27989
	300	42.84	41.58	39.06	50.4	49.14	50.4	45.57	5.00312			300	42.84	42.84	40.32	45.36	46.62	45.36	43.89	2.31191
	500	58.8	56.7	54.6	65.1	63	63	60.2	4.12941			500	56.7	58.8	56.7	60.9	60.9	60.9	59.15	2.0647
	1000	50.4	46.2	50.4	50.4	50.4	50.4	49.7	1.71464			1000	46.2	42	46.2	54.6	54.6	54.6	49.7	5.58247

## Sheet: Fig. 4
				Respiration rate (μmol O2g FW-1h-1)
Treatments	Triplicate 1	Triplicate 2	Triplicate 3	Mean	SD
8:16 LC	46.4516	40.7547	44.0816	43.7627	2.86181
8:16 HC	44.5361	45	45	44.8454	0.26784
12:12 LC	44.0816	29.1892	29.589	34.2866	8.48508
12:12 HC	42.9139	46.9565	48.5393	46.1366	2.90096
16:8 LC	46.2857	43.6364	37.8947	42.6056	4.2894
16:8 HC	62.6087	70.8197	66.4615	66.63	4.10808

## Sheet: Fig. 5
				Chl a (mg g-1FW)								Chl b (mg g-1 FW)								Chl a/ b
Treatments	Triplicate 1	Triplicate 2	Triplicate 3	Mean	SD			Treatments	Triplicate 1	Triplicate 2	Triplicate 3	Mean	SD			Treatments	Triplicate 1	Triplicate 2	Triplicate 3	Mean	SD
8:16 LC	2.3404	2.6203	2.43508	2.46526	0.14237			8:16 LC	1.41654	1.60345	1.60201	1.54067	0.1075			8:16 LC	1.65219	1.63416	1.52002	1.60212	0.07168
8:16 HC	1.57112	1.20398	1.09181	1.28897	0.2507			8:16 HC	0.9589	0.78345	0.7053	0.81588	0.12987			8:16 HC	1.63846	1.53677	1.54801	1.57441	0.05575
12:12 LC	1.27655	1.22145	1.08798	1.19532	0.09696			12:12 LC	0.88057	0.81029	0.70862	0.79983	0.08645			12:12 LC	1.44969	1.50742	1.53535	1.49749	0.04369
12:12 HC	1.118	1.27983	1.14071	1.17951	0.08762			12:12 HC	0.67998	0.80277	0.67525	0.71934	0.07229			12:12 HC	1.64417	1.59427	1.68932	1.64258	0.04754
16:8 LC	0.80142	0.81205	0.54801	0.72049	0.14947			16:8 LC	0.49952	0.52814	0.3518	0.45982	0.09463			16:8 LC	1.60438	1.53757	1.55773	1.56656	0.03427
16:8 HC	0.40768	0.48896	0.44831	0.44832	0.04064			16:8 HC	0.26742	0.34106	0.30424	0.30424	0.05207			16:8 HC	1.52449	1.43365	1.47354	1.47723	0.04553
